## ERRATA

*Journal of Experimental Biology*, 59 (1973), 753-766

H. WINET

### 'Wall drag on free-moving ciliated microorganisms'

The coefficient of the first  $c/R_0$  term in equation (3) was incorrectly calculated as 1.43. Its value should be changed to  $K$ , where  $K = 0.383$  for *Tetrahymena*, 0.445 for *P. caudatum* and 0.452 for *P. multimicromucleatum*. In addition the letters  $c$  and  $a$  should be interchanged in the equation.

Three important consequences of this correction are:

1. The prolate spheroid curve in Figs. 3-5 will shift so that it merges with the sphere curve at  $25 \leq (R_0/R) - 1 \leq 40$ .

2. Table 2 columns should read:

|      |       |
|------|-------|
| 0.50 | 3.1   |
| 0.75 | 7.8   |
| 0.90 | 23.2  |
| 0.92 | 25.1  |
| 0.98 | 982.1 |

3. The first three sentences of the Conclusion section (p. 762) should read:

'Equation (3) may not be considered adequate for determining the value of  $S$  safe from wall drag on the body of a sinking ciliate. The error in its estimate of  $S$  lies in the undesirable direction of underrating a minimum reliable tube bore diameter. The difference between the plots for the models and the organisms (see Figs. 3-5 after adjustment), together with the dependence of both (3) and (4) on fore-aft symmetry and axisymmetry, leads to the conclusion that this error is a function of geometry.'

Two corrections not related to the above are:

1. The definitions for  $S_e$  and  $S_w$  (p. 766) should be interchanged.

2. The first credit name (p. 766) should be spelled Mr Lang Wah Lee.
